# Supplementary material for: The Influence of Relatives on the Efficiency and Error Rate of Familial Searching
Source: PubMed Central journal article supplement (PMC3743829; doi:10.1371/journal.pone.0070495), 2013-08-14
Supplement: pone.0070495.s001.pdf [file pone.0070495.s001.pdf]

# Supporting Information File S1

The influence of relatives on the efficiency and error rate of familial searching

Rori V. Rohlf<sup>a</sup>, Erin Murphy<sup>b</sup>, Yun S. Song<sup>c,d</sup>, Montgomery Slatkin<sup>a</sup>

<sup>a</sup>Department of Integrative Biology, University of California, Berkeley, CA 94720, USA

<sup>b</sup>School of Law, New York University, New York, NY 10012, USA

<sup>c</sup>Computer Science Division, University of California, Berkeley, CA 94720, USA

<sup>d</sup>Department of Statistics, University of California, Berkeley, CA 94720, USA

## Supporting Tables

Table S1: Normalized California census and prison population frequencies.

|                   | simulated population |                  |                   |                 |                 |
|-------------------|----------------------|------------------|-------------------|-----------------|-----------------|
|                   | Asian                | African American | European American | Latino American | Native American |
| Census population | .133                 | .0633            | .410              | .384            | .0102           |
| Prison population | .00626               | .303             | .268              | .413            | .00940          |

Note: We make use of these normative racial categorical constructs to estimate relevant population-specific identification rates. However, it's clear that membership in these categories is not mutually exclusive. By nature, assumptions must be made in the collection and tabulation of this sort of data. Further, as with all collected social data, some groups may be under or over-represented in data collection, and categorical results are subject to biases of reporting method (self-identified, inferred, etc.) (Spade and Rohlf, *in review*).

Table S2: Projected percent of false parent-offspring leads which involve at least one individual from each population sample

|                   | total FPR | simulated population |                  |                   |                 |                 |
|-------------------|-----------|----------------------|------------------|-------------------|-----------------|-----------------|
|                   |           | Vietnamese American  | African American | European American | Latino American | Native American |
| Census population | 5.73e-08  | 28.3                 | 0.560            | 38.5              | 38.59           | 0.114           |
| Prison population | 3.84e-08  | 0.182                | 16.3             | 25.3              | 62.9            | 0.122           |

Table S3: Estimated percent of false sibling identifications which involve at least one individual from each population sample

|                   | total<br>FPR | simulated population   |                     |                      |                    |                    |
|-------------------|--------------|------------------------|---------------------|----------------------|--------------------|--------------------|
|                   |              | Vietnamese<br>American | African<br>American | European<br>American | Latino<br>American | Native<br>American |
| Census population | 3.01e-07     | 67.9                   | 0.266               | 10.6                 | 22.3               | 0.0849             |
| Prison population | 1.06e-07     | 0.459                  | 15.2                | 13.5                 | 73.1               | 0.199              |

Table S4: Parent-offspring test identification rates for different Y-sharing relatives and population samples where the set of reference Y-haplotypes was down-sampled to 103 haplotypes per population sample. The similarity of these results to those with the full set of Y-haplotypes indicates that the varying reference sample sizes are not driving population-based differences in identification rates.

|                  | Vietnamese<br>American | African<br>American | European<br>American | Latino<br>American | Native<br>American |
|------------------|------------------------|---------------------|----------------------|--------------------|--------------------|
| parent-offspring | 0.971109               | 0.917481            | 0.900600             | 0.904750           | 0.981429           |
| sibling          | 0.260568               | 0.238175            | 0.247218             | 0.240125           | 0.346432           |
| half-sib         | 0.052082               | 0.037330            | 0.039416             | 0.037430           | 0.099234           |
| cousin           | 0.008184               | 0.004503            | 0.005204             | 0.004543           | 0.024529           |
| half-cousin      | 0.002859               | 0.001183            | 0.001447             | 0.001275           | 0.010976           |
| second cousin    | 0.001570               | 0.000522            | 0.000741             | 0.000616           | 0.007245           |

Table S5: Sibling test identification rates for different Y-sharing relatives and population samples where the set of reference Y-haplotypes was down-sampled to 103 haplotypes per population sample. The similarity of these results to those with the full set of Y-haplotypes indicates that the varying reference sample sizes are not driving population-based differences in identification rates.

|                  | Vietnamese<br>American | African<br>American | European<br>American | Latino<br>American | Native<br>American |
|------------------|------------------------|---------------------|----------------------|--------------------|--------------------|
| sibling          | 0.786012               | 0.677311            | 0.636255             | 0.645179           | 0.831449           |
| parent-offspring | 0.750433               | 0.595312            | 0.521906             | 0.536782           | 0.815689           |
| half-sib         | 0.166490               | 0.070316            | 0.055062             | 0.056729           | 0.240527           |
| cousin           | 0.043701               | 0.010769            | 0.008384             | 0.008458           | 0.080298           |
| half-cousin      | 0.016970               | 0.002642            | 0.002165             | 0.002175           | 0.038323           |
| second cousin    | 0.009340               | 0.001130            | 0.000979             | 0.000928           | 0.024955           |
